# Supplementary material for: The effects of young and aged, male and female megakaryocyte conditioned media on angiogenic properties of endothelial cells
Source: publisher site journal article supplement (doi:10.18632/aging.206077), 2024-11-22
Supplement: Supplementary file [file aging-v16i21-206077-supplementary-material-SD1.pdf]

SUPPLEMENTARY FIGURE

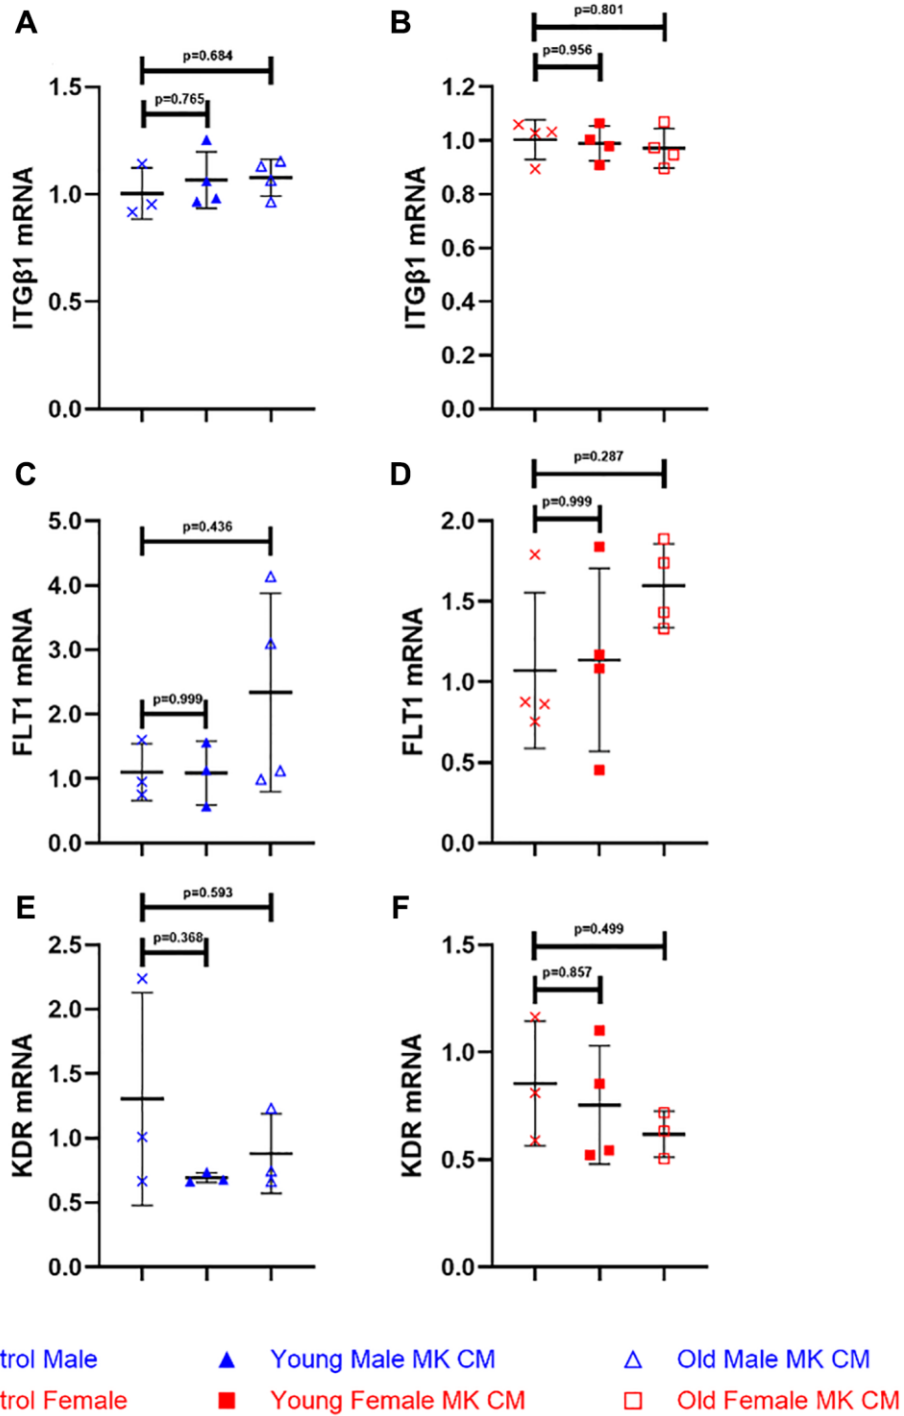

**Supplementary Figure 1. MK CM did not alter BMEC expression of several genes.** ITGβ1 (A, B), FLT-1 (C, D), and KDR (E, F) expression were not changed in BMECs by MK CM treatments. The changes in mRNA expression were quantified following an overnight incubation period. Data are expressed as a mean ± SD fold change relative to their respective controls with post-hoc *p*-values listed in each panel (*n* = 3–4 biological replicates/group). GAPDH was used as an internal control. Significance was determined using one-way ANOVA with Tukey’s post-hoc analysis or Kruskal-Wallis test with Dunn’s post-hoc analysis depending on the normalcy of the data distribution as determined by a Shapiro-Wilk test.
